# Supplementary material for: Whole Exome Sequencing Identifies PHF14 Mutations in Neurocytoma and Predicts Responsivity to the PDGFR Inhibitor Sunitinib
Source: MDPI journal article supplement (doi:10.3390/biomedicines10112842), 2022-11-08
Supplement: s1 [file s1]

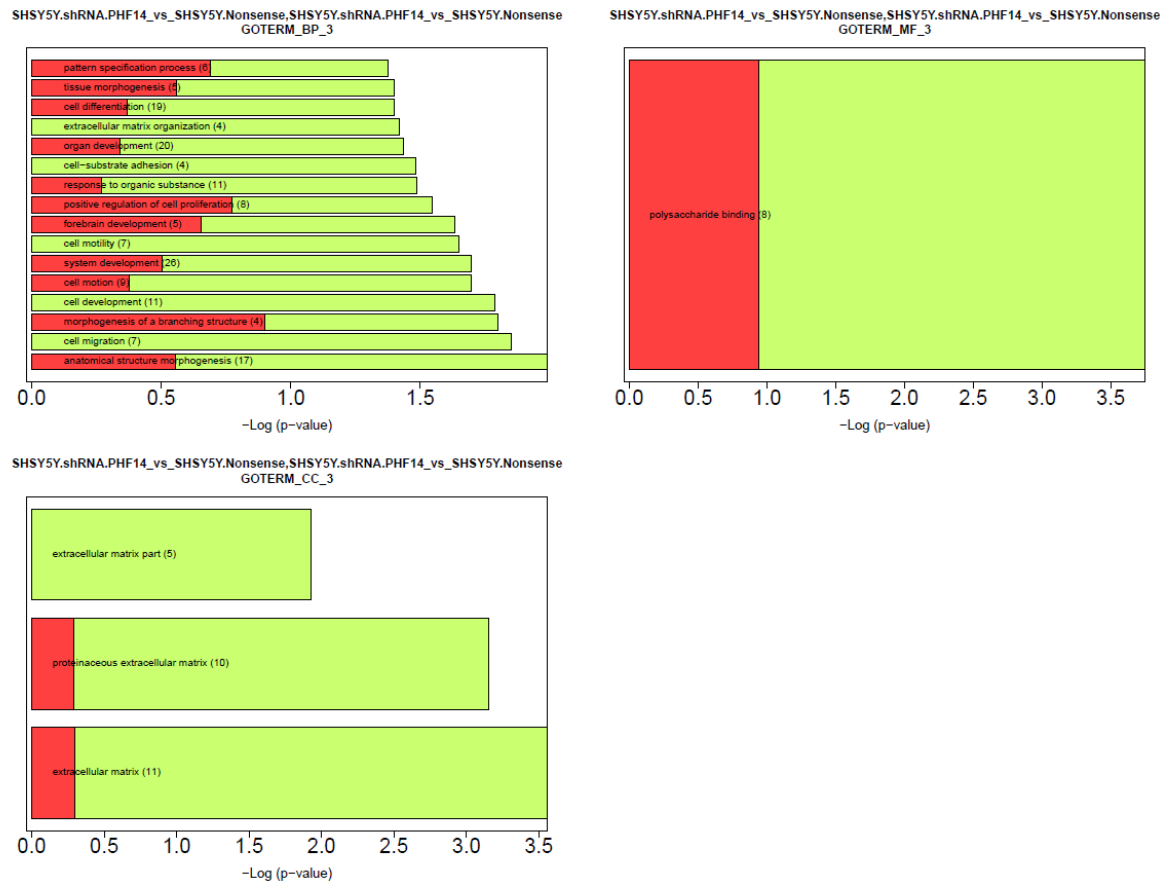

**Figure S1.** Gene Ontology analysis of mRNA profiles in SHSY-5Y nonsense control cells and shRNA PHF14 knockdown cells was performed to characterize changes in biological process (BP), molecular function (MF) and cellular components (CC) caused by PHF14 knockdown.
